# Supplementary material for: Reverse vaccinology-based design of a universal multiepitope vaccine against chikungunya virus: phylogenetic and immunoinformatics approaches
Source: Research Square preprint supplement (doi:10.21203/rs.3.rs-7255061/v1), 2025-08-06
Supplement: Supplementary file 1 [file fcde0afd7c0e412e99c8ec9d.docx]

**Supplementary Table 1. Dataset summary for phylogenetic and epitope analysis of CHIKV.**

| **Step** | **Description** |
| --- | --- |
| **Database and download date** | Genomic sequences of CHIKV were retrieved from NCBI on May 27, 2025. |
| **Initial dataset** | 2,798 sequences were downloaded, annotated as coding sequences (CDS), including both nucleotide and amino acid formats. |
| **Structural proteins identified** | 2,557 of the downloaded sequences contained annotated structural protein coding regions. |
| **Genotyped sequences (NCBI)** | 1,652 sequences contained genotype annotations based on NCBI metadata. |
| **Additional West African sequences** | Seven West African genotype sequences (HM045816.1, HM045785.1, HM045815.1, HM045818.1, AY726732.1, HM045820.1, HM045817.1) were added. |
| **Pre-cleaning total** | 1,652 NCBI-annotated sequences + 7 literature sequences = 1,659 input sequences. |
| **Sequence filtering and QC** | Sequences with ambiguous bases (N) were removed. Sequences < 2811 bp (75% of full genome length) were excluded. |
| **Post-filtering dataset** | 1,429 high-quality sequences retained for downstream analysis. |
| **Lineage distribution** | Asian: 234 sequences ECSA: 1,158 sequences West African: 37 sequences |
| **Filtering tools** | UNIX tools: grep, awk, sed, cat, sortBioinformatics: seqkit, samtools, BBTools reformat.sh |
| **Multiple Sequence Alignment (MSA)** | Performed using MAFFT with FFT-NS-2 algorithm; unaligned regions trimmed with trimAl. |
| **Model selection and tree building** | Best-fit model (GTR+I+G4) selected using ModelTest-NG; ML phylogenetic tree constructed using RAxML-ng with 1,000 bootstrap replicates. |
| **Tree visualization** | Generated tree visualized using FigTree. |
| **Protein dataset for consensus** | 1,429 amino acid sequences processed to remove redundancy using CD-HIT, resulting in 553 non-redundant sequences (Asian: 85; ECSA: 457; West African: 11). |
| **Consensus sequence generation** | Lineage-specific consensus sequences generated using MUSCLE and EMBOSS; a global consensus was constructed from the three genotypes. |
| **Manual correction** | Ambiguous residue 'X' at position 643 replaced with 'V' based on ECSA consensus. |
| **Structural protein extraction** | Based on global consensus, structural polyprotein regions were defined: - Capsid (1–261) - E3 (262–325) - E2 (326–748) - 6K (749–809) - E1 (810–1248). |
| **Extraction tool** | Protein regions extracted using samtools. |

**Supplementary Table 2. Structural validation scores and quality assessment of the final MEV-CHIKV tertiary model.**

| **Validation Tool** | **Metric** | **Score / Value** | **Interpretation** |
| --- | --- | --- | --- |
| **PSIPRED** | Secondary structure composition | Strand = 26 / 198 aa (13.13%) Helix = 52 / 198 aa (26.26%) Coil = 120 / 198 aa (60.61%) | Proportion of α-helix, β-sheet, coils |
| **D-I-TASSER - Galaxy Refine** | eTM score / RMSD / GDT-HA / MolProbity / Clash score / Poor rotamers / Rama favored | eTM Score = 0.34 GDT-HA = 0.9255 RMSD = 0.495 MolProbity = 1.392 Clash score = 7.1 Poor rotamers = 0.0 Rama favored = 98.5 | Model confidence and accuracy |
| **ProSA** | Z-score | Z-score = -3.73 | Overall model quality (compared to PDB) |
| **SAVES v6.1** | ERRAT Score | ERRAT Score = 95.536 | Non-bonded atom interactions |
| Procheck - Ramachandran Plot (%) | 94.2% core 3.9% allowed 1.3% generously allowed 0.6% disallowed | Most favored, allowed, and outlier regions |
| **MolProbity** | Clashscore / MolProbity Score | Clashscore = 2.87 Molprobity Score = 1.08 | Geometry quality, steric clashes |
| **CABS-Flex 3.0** | RMSF | RMSF=  - minimum: 0.734  - median: 1.989  - maximum: 9.328 | Residue flexibility and dynamic behavior |
